# Supplementary material for: Neonatologists’ Resuscitation Decisions at Birth for Extremely Premature Infants. A Belgian Qualitative Study
Source: Frontiers journal article supplement (doi:10.3389/fped.2022.852073), 2022-03-24
Supplement: Data_Sheet_2.PDF [file Data_Sheet_2.PDF]

## INTERVIEW GUIDE

1. Presentation
2. Reference to the information brochure
3. Reference to the informed consent
4. Ask if they have further questions
5. Ask permission to record the interview

### **Introduction**

*Extremely Premature Infants* (EPIs) are babies born before the 28<sup>th</sup> complete week of gestation. They generally need resuscitation which is a difficult decision. I am interested in the ethical complexities of deciding whether to resuscitate EPIs.

I firstly did a search of the empirical and ethical literature and I have obtained a good ethical and theoretical description of this decision-making. But I still don't know how resuscitation decisions are made in practice from the perspective of the physicians who make this decision.

To do so I need to understand your experience, the challenges you met, how you dealt with them, and the reasons that motivate your choices. To understand that I need real cases.

I want to make to clear though first that I will remove any identifiable detail of the cases from the transcript. Second, that I will not judge the cases or your actions. I need these cases to understand the ethical challenges and how you deal with them in real practice not to evaluate if the decision was good or bad.

## **PART 1: CLINICAL CASE**

### **WARMING-UP QUESTIONS**

Look at the questionnaire and see if you want to ask something more there

- Do you have a hospital policy or guideline?
- Do you agree with it? What's your opinion on it?
- Why did you set the threshold for non-resuscitation at that week?

### **POSSIBLE OPENING QUESTION**

(I will use one of the following opening questions depending on the results of the questionnaire)

**Do you have a case above 25 weeks?**

**Do you have a case below 24 weeks?**

**Do you have a case that you perceived easy?**

- Why is this case easy?
- What would be a difficult case?
- What are the factors that make a case easy or difficult?
- What if parents asked the opposite?

Based on the description of the case I will make questions to further understand the case and obtain the most comprehensive description possible.

Examples of such questions are:

Questions related to the clinical case

- What was your role in the decision making?
- What do you think of the situation?
- What was the main problem?
- What was the decision made?
- What were the alternatives?

Questions related to decision-makers reactions

- Can you tell me how did you feel in the decision making?
  - o What factors complicated the decision making?
  - o What factors facilitate it?
- Can you tell me how did the other caregivers react to the decision?
- Can you tell me how did the parents react to the decision?

Once we have a complete overview of the case I will make questions to achieve a deeper understanding of the following themes within the case. For each themes examples of questions are provided.

### **Ethical values**

- Did you perceive any ethical issue?
- Which was the most important?

- How did you manage them?
- Do you think that resource allocation is a relevant factor to consider in this case?
- Do you think it was the right choice? / would you make the same decision? / are there things you would do differently?

### **Role of parents**

- What was the role of parents?
- Do you think parents should have been more/less involved?
- Were you comfortable with parents' requests?

### **POSSIBLE QUESTIONS ON OTHER CASES**

We will ask for other cases for a comparison. The specific question will change depending on the previous case description (for example if the first case was about an EPI outside the grey zone I will ask for a case about an EPI inside the grey zone)

**Can you describe a case involving an EPI born inside/outside the grey zone?**

**Can you describe a case in which the decision making was more/less difficult?**

- How does your decision-making change inside and outside the grey zone?
- What are the main differences?
- What makes this case more/less difficult than the previous one?
- Do you perceive the same ethical issues compared with the previous one?

- Why is your position different?

## **PART 2: Conclusions**

### **POSSIBLE CONCLUDING QUESTIONS**

**If you were invited by the ethics committee of your hospital to participate in the development of ethics policy on (non)resuscitation of EPIs, what would be the key-message that should be integrated in the policy?**

**If you have to advise a young colleague on managing (non)resuscitation decisions/ non resuscitation requests, what would you advise?**
